# Supplementary material for: LncRNA ANRIL is up-regulated in nasopharyngeal carcinoma and promotes the cancer progression via increasing proliferation, reprograming cell glucose metabolism and inducing side-population stem-like cancer cells
Source: PubMed Central journal article supplement (PMC5308687; doi:10.18632/oncotarget.11437), 2016-08-20
Supplement: oncotarget-07-61741-s001.pdf [file oncotarget-07-61741-s001.pdf]

## LncRNA ANRIL is up-regulated in nasopharyngeal carcinoma and promotes the cancer progression via increasing proliferation, reprogramming cell glucose metabolism and inducing side-population stem-like cancer cells

### Supplementary Materials

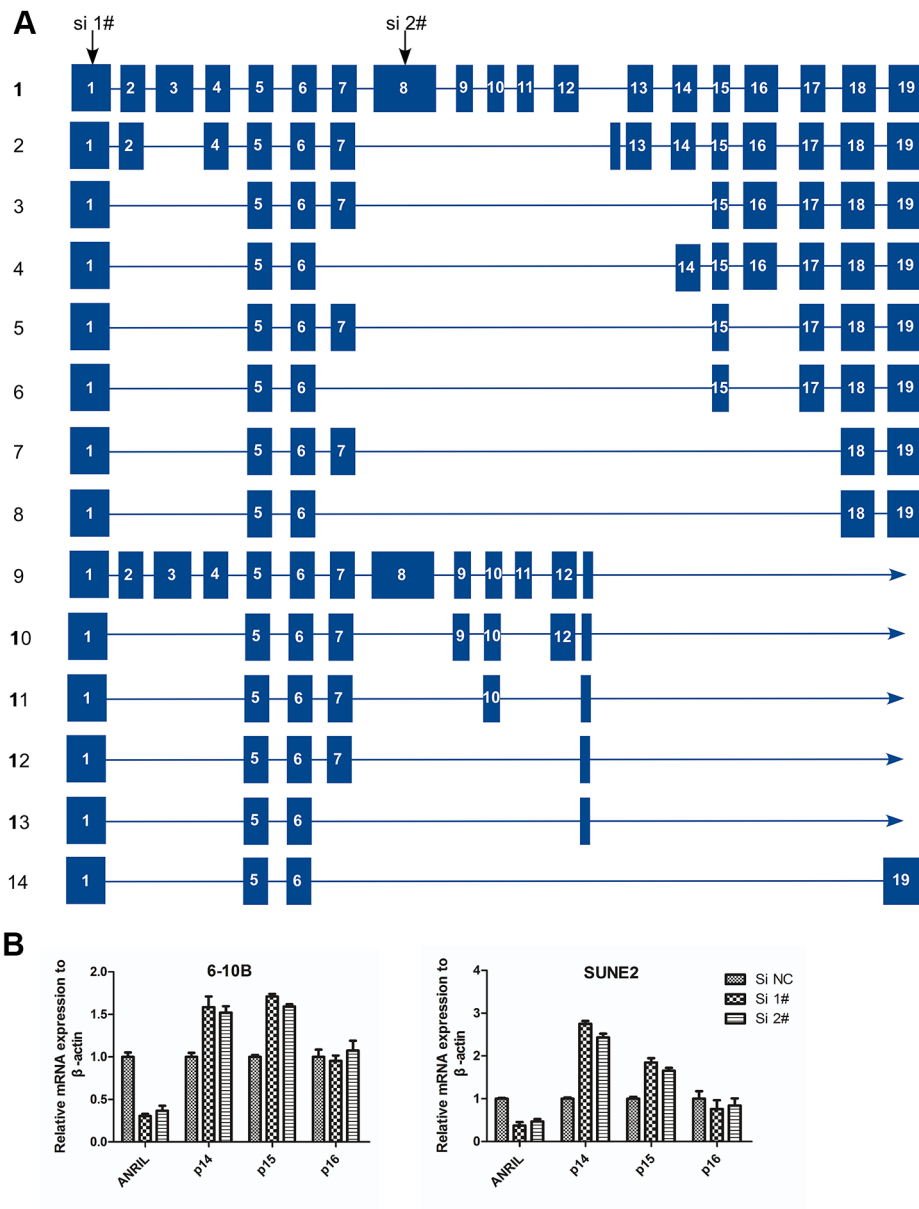

**Supplementary Figure S1: ANRIL enjoyed multiple transcript isoforms and affected the INK4B-ARF-INK4A gene cluster expression.** (A) Diagrammatic representation of the ANRIL gene and the 14 transcripts. The tow arrows showed the targeted site of siRNAs for ANRIL. (B) Knock-down of ANRIL in SUNE2 and 6-10B cells increased the expression of p14 and p15 in RNA level, with no effect on p16 expression.
